# Supplementary material for: Estimation of bubble-mediated air–sea gas exchange from concurrent DMS and CO 2 transfer velocities at intermediate–high wind speeds
Source: Copernicus journal article supplement (doi:10.5194/acp-17-9019-2017), 2017-07-27
Supplement: Supplementary file 1 [file acp-17-9019-2017-supplement.zip]

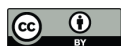

## *Supplement of*

# **Estimation of bubble-mediated air–sea gas exchange from concurrent DMS and CO<sub>2</sub> transfer velocities at intermediate–high wind speeds**

**Thomas G. Bell et al.**

*Correspondence to:* Thomas G. Bell (tbe@pml.ac.uk)

- acp-17-9019-2017-supplement-title-page.pdf
- Supplemental info and table
  - Supplemental Info\_20170607\_ACPsubmission.docx
  - TableS1revised.xlsx

The copyright of individual parts of the supplement might differ from the CC BY 3.0 License.
